# Supplementary material for: A Power Compensation Strategy for Achieving Homogeneous Microstructures for 4D Printing Shape-Adaptive PNIPAM Hydrogels: Out-of-Plane Variations
Source: MDPI journal article supplement (doi:10.3390/gels8120828), 2022-12-15
Supplement: s1 [file s1]

# Power Compensation Strategy for Achieving Homogeneous Microstructures for 4D Printing Shape-Adaptive PNIPAM Hydrogels: Out-of-Plane Variations

Liyuan Tan <sup>1,†</sup>, Hyunjin Lee <sup>2</sup>, Li Fang <sup>2</sup> and David J. Cappelleri <sup>1,2,\*</sup>

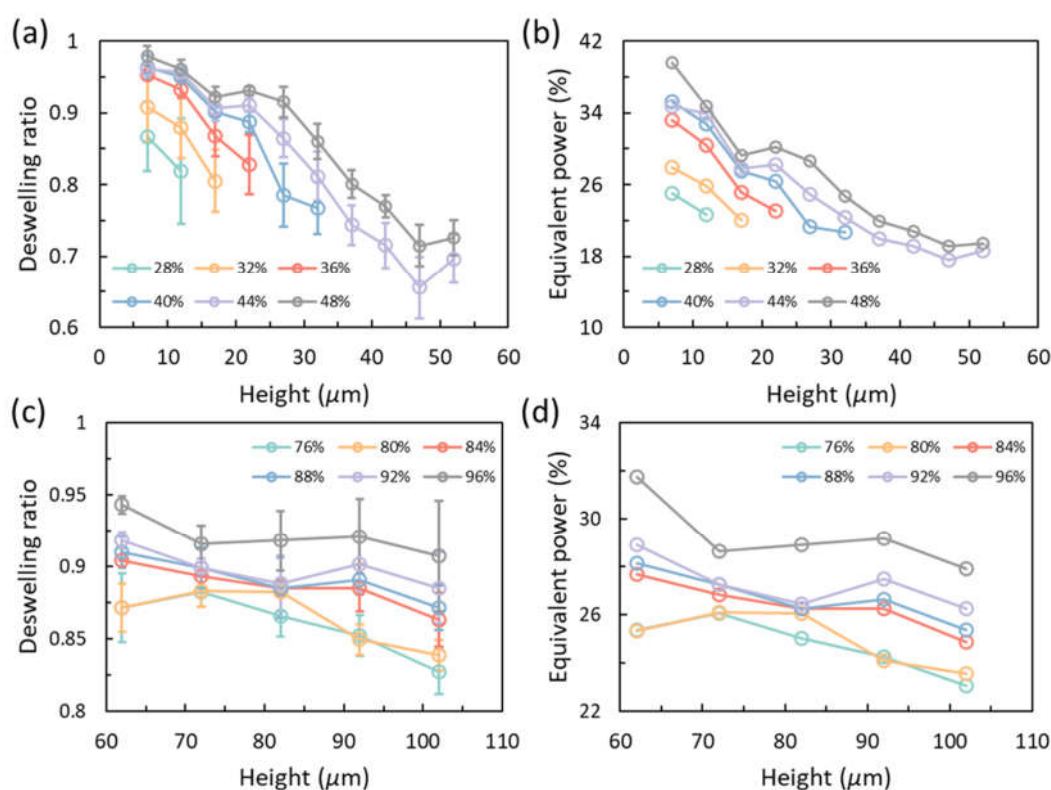

**Figure S1.** Power decay data for higher and lower initial power in precursor. (a) and (b) Deswelling ratio and equivalent power for powers from 28% to 48%. (c) and (d) Deswelling ratio and equivalent power for powers from 76% to 96%.

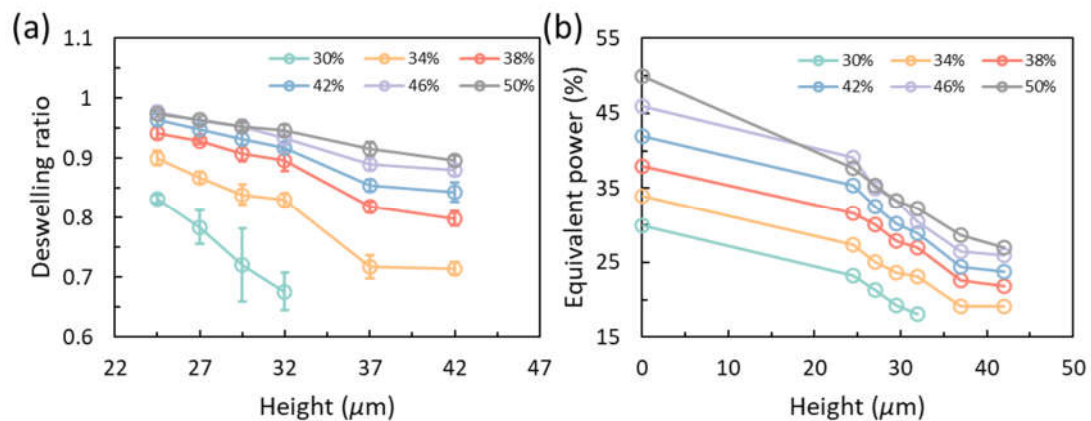

**Figure S2.** Power decay along with height for penetrating layers achieved by the same initial laser power. (a) and (b) Deswelling ratio and equivalent power for powers from 30% to 50%.

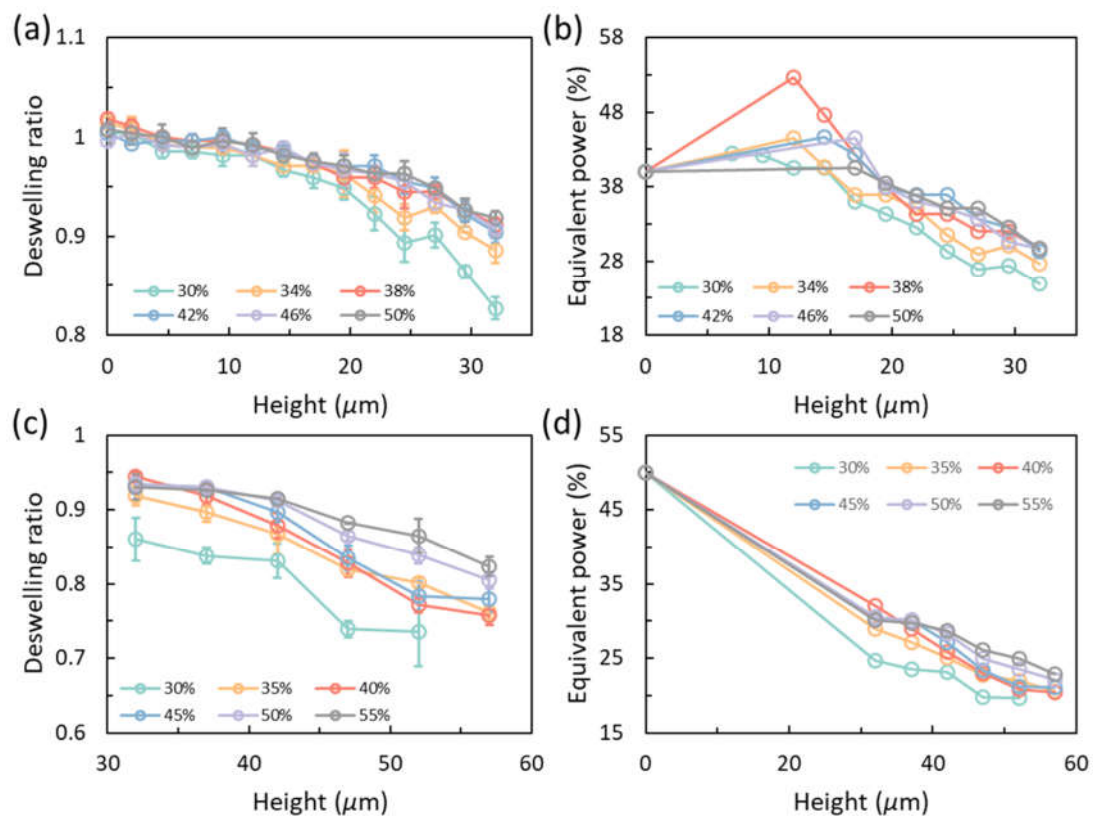

**Figure S3.** Power decay of the characterization layer achieved by an identical initial laser power but with a base printed by different initial powers. (a) and (b) Deswelling ratio and equivalent power for characterization layer with an initial power of 40%. (c) and (d) Deswelling ratio and equivalent power for characterization layer with an initial power of 50%. Legends are powers used to obtain the bases.

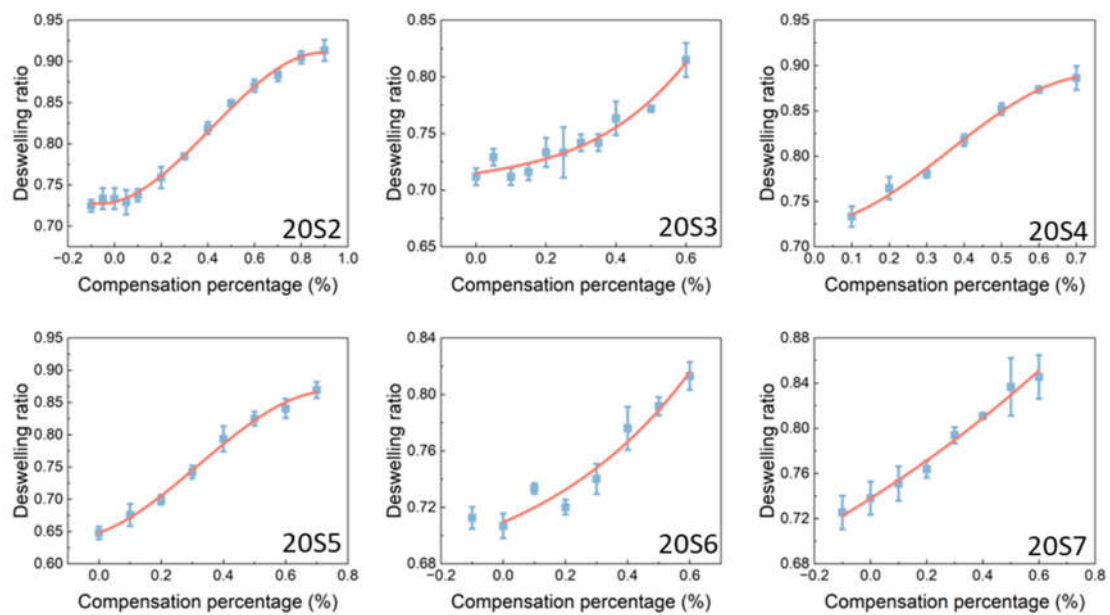

**Figure S4.** Deswelling ratios for different compensation percentages for different steps for 20% of initial power. The power and step number are marked on the bottom right of each plot. For example, “20S2” means step 2 for 20% of initial power.

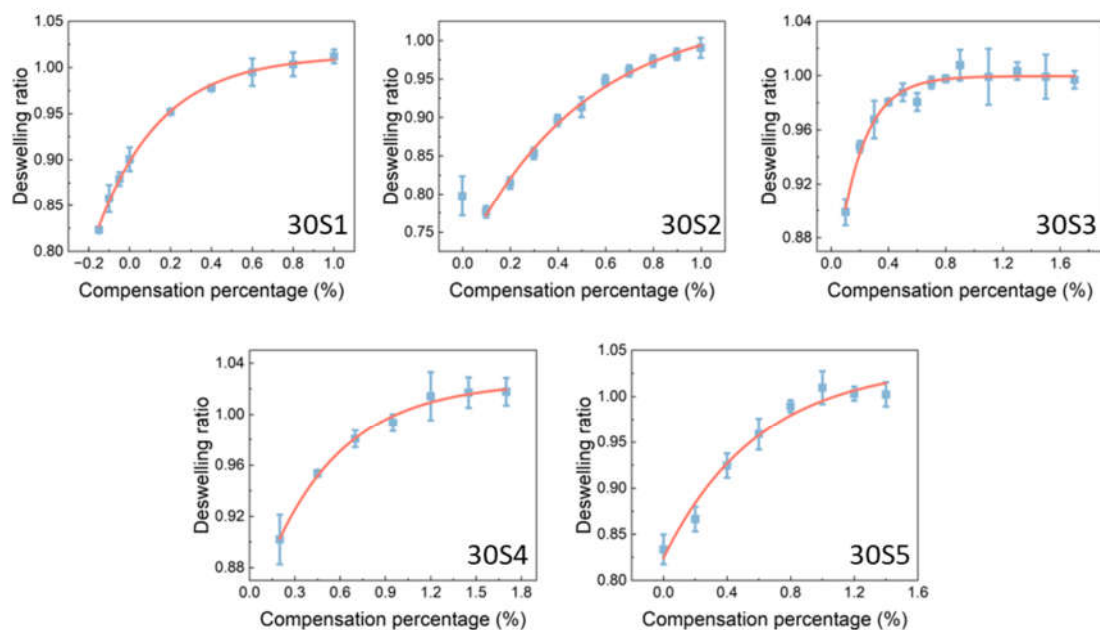

**Figure S5.** Deswelling ratios for different compensation percentages for different steps for 30% of initial power. The power and step number are marked on the bottom right of each plot. For example, “30S1” means step 1 for 30% of initial power.

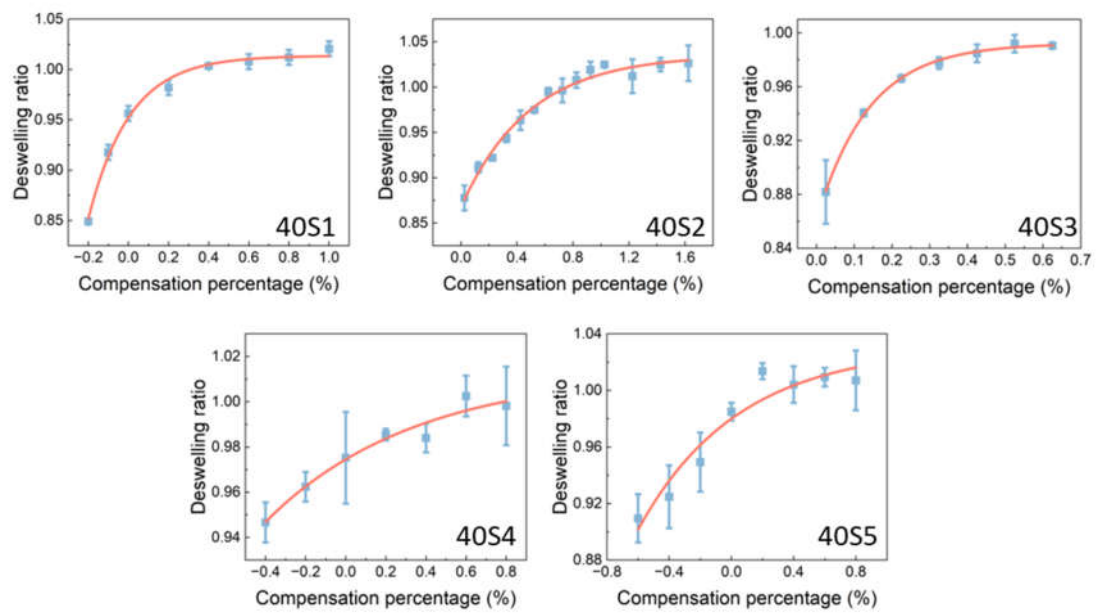

**Figure S6.** Deswelling ratios for different compensation percentages for different steps for 40% of initial power. The power and step number are marked on the bottom right of each plot. For example, “40S1” means step 1 for 40% of initial power.

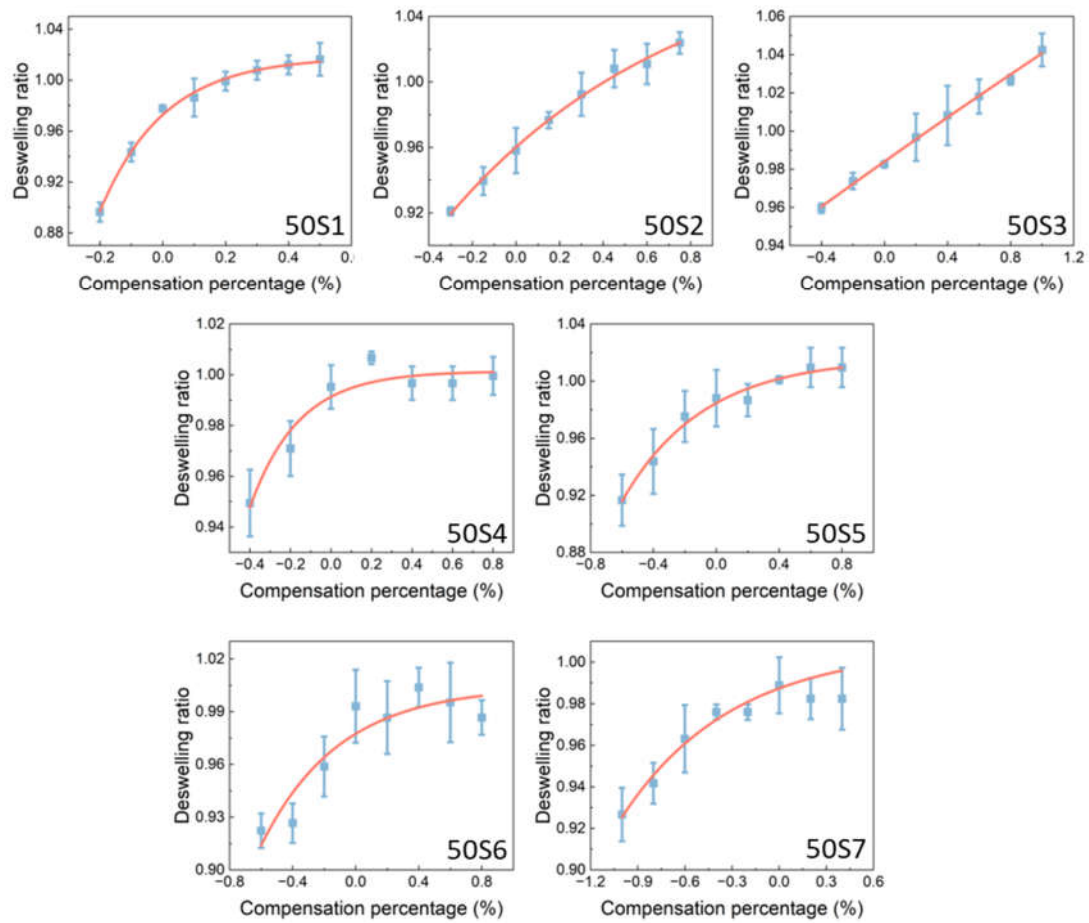

**Figure S7.** Deswelling ratios for different compensation percentages for different steps for 50% of initial power. The power and step number are marked on the bottom right of each plot. For example, “50S1” means step 1 for 50% of initial power.

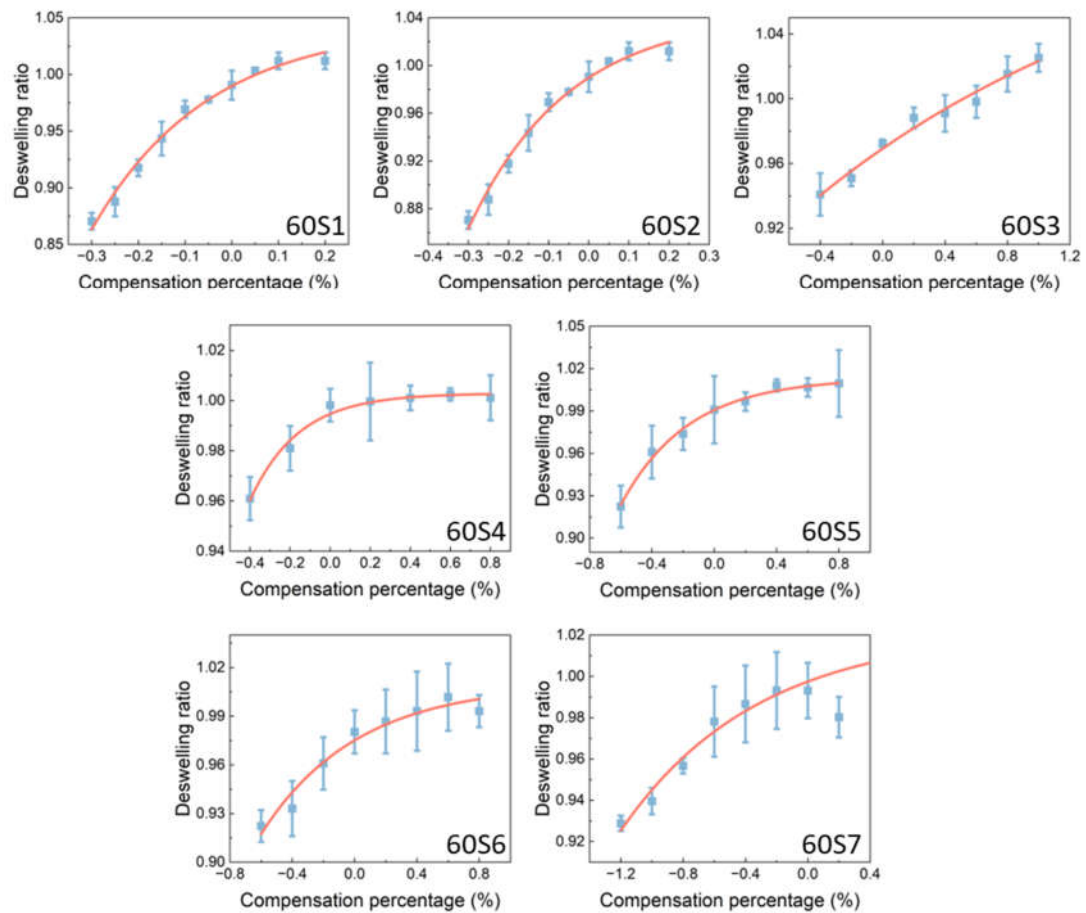

**Figure S8.** Deswelling ratios for different compensation percentages for different steps for 60% of initial power. The power and step number are marked on the bottom right of each plot. For example, “60S1” means step 1 for 60% of initial power.

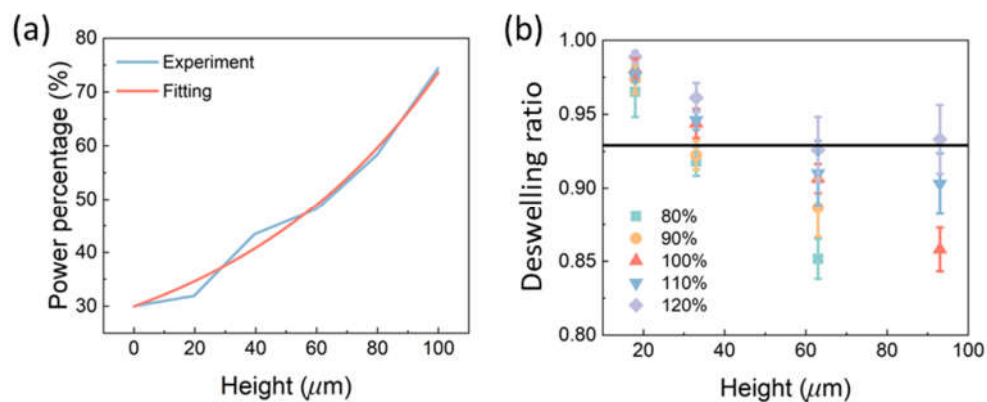

**Figure S9.** Deswelling ratios of samples printed with power compensation based on the exponential fitting with the piecewise-linear data. (a) The exponential fitting of the piecewise-linear curve. (b) Deswelling ratio of the samples based on the exponential fitting with adjustments with different percentages. The black line shows the desired deswelling ratio for the calibration.

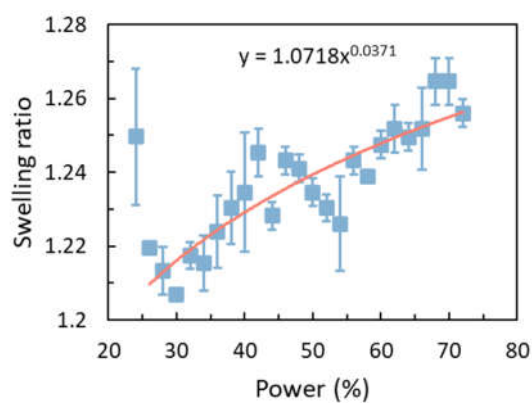

**Figure S10.** Swelling ratios of the standard prints in alkaline solution.

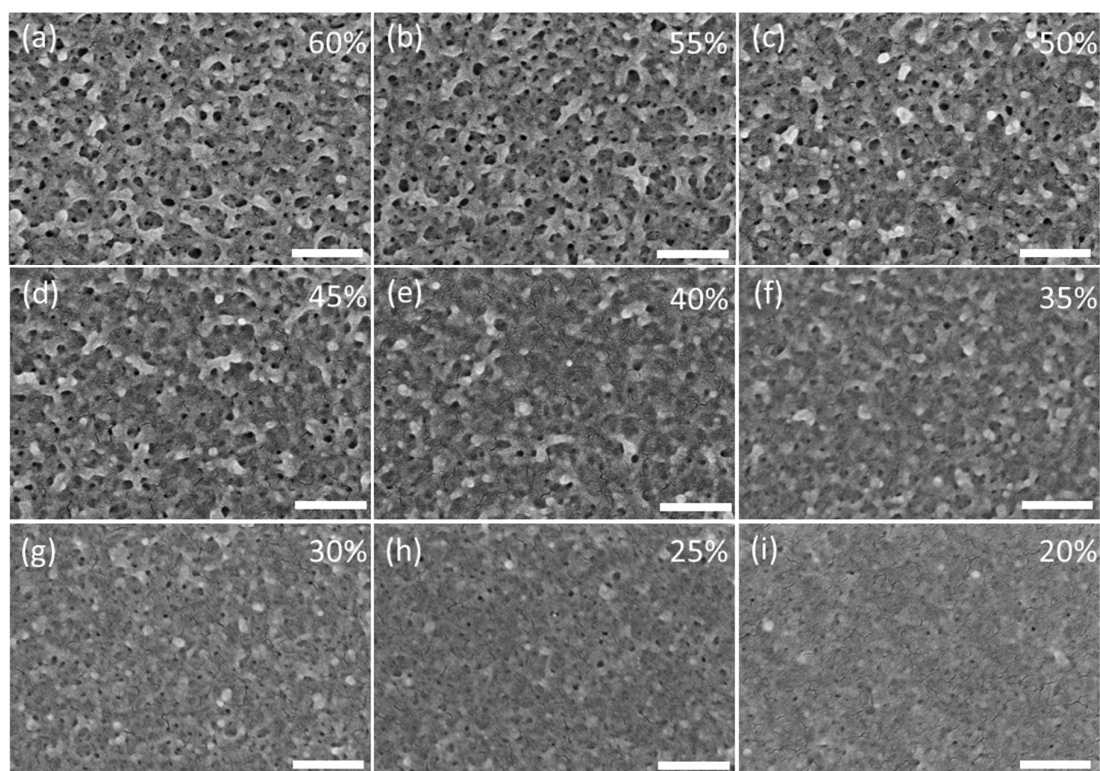

**Figure S11.** Microstructures of the standard prints with different laser powers by freeze drying in DI water. Scale bars: 500 nm.

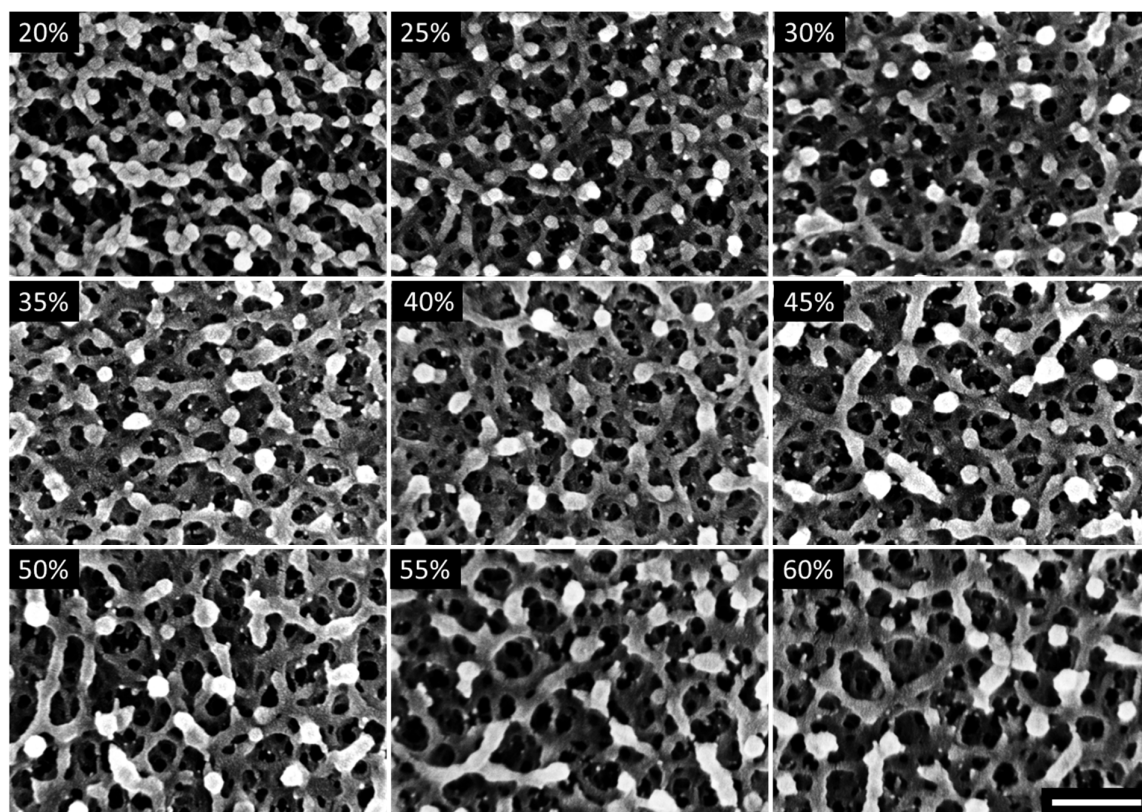

**Figure S12.** Microstructures of the standard prints with different laser powers by critical point drying in ethanol. Scale bar: 300 nm.

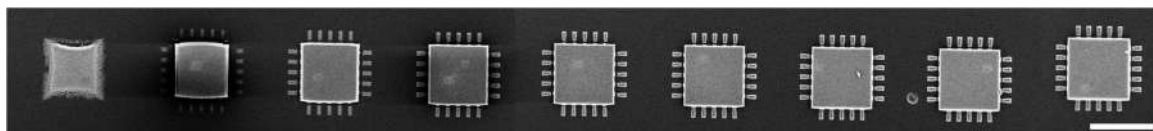

**Figure S13.** SEM images of the standard prints processed by critical point drying. The laser power is 20% to 60% from left to right with an increment of 5%. Scale bar: 25  $\mu\text{m}$ .

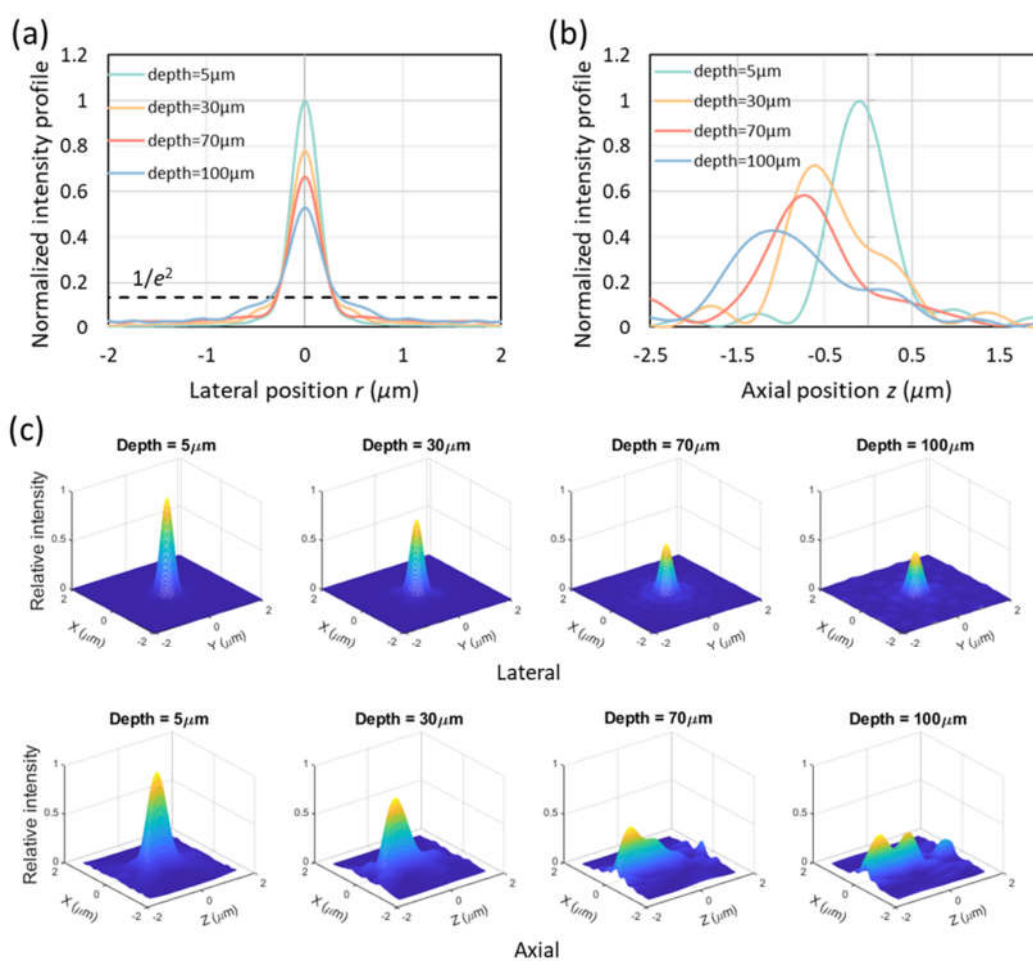

**Figure S14.** Intensity profiles of the laser light at different penetration depths. (a) Lateral profile. (b) Axial profile with focal shift. (c) 3D views of the intensity profile.

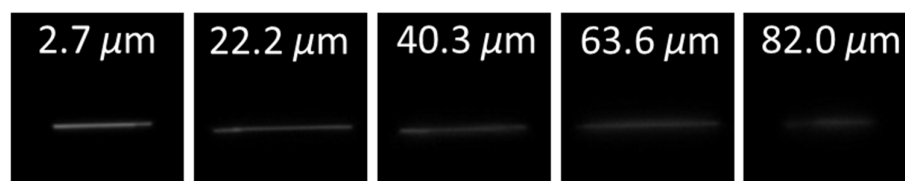

**Figure S15.** Real-time scanning lines of the laser at different heights printing a model in Figure 1b with an initial power of 50%.
